# Supplementary material for: Carbon dots up-regulate heme oxygenase-1 expression towards acute lung injury therapy
Source: Royal Society of Chemistry journal article supplement (doi:10.1039/d1tb01283e), 2021-01-01
Supplement: d1tb01283e1.pdf [file d1tb01283e1.pdf]

## Supporting Information

### Carbon dots up-regulate heme oxygenase-1 expression towards the acute lung injury therapy

Bo Wang<sup>a,§</sup>, Peipei Liu<sup>a,§</sup>, Hui Huang<sup>a,\*</sup>, Xiting Wang<sup>a</sup>, Mengling Zhang<sup>a</sup>, Jian Huang<sup>b</sup>, Fang Lu<sup>c,\*</sup>, Jian Chen<sup>a,d\*</sup>, Yang Liu<sup>a</sup> and Zhenhui Kang<sup>a,c,\*</sup>

<sup>a</sup> Institute of Functional Nano & Soft Materials (FUNSOM), Jiangsu Key Laboratory for Carbon-Based Functional Materials & Devices, Soochow University, 199 Ren'ai Road, Suzhou, 215123, Jiangsu, China.

<sup>b</sup> School of Biology & Basic Medical Science, Soochow University, 199 Ren'ai Road, Suzhou, 215123, Jiangsu, China.

<sup>c</sup> Macao Institute of Materials Science and Engineering, Macau University of Science and Technology, Taipa 999078, Macau SAR, China.

<sup>d</sup> Chinese Institute for Brain Research, Research Unit of Medical Neurobiology, Chinese Academy of Medical Sciences, Beijing, 102206, China.

<sup>e</sup> School of Life Sciences, Beijing University of Chinese Medicine, Beijing 100029, China.

§ These authors contributed equally to this work.

\*E-mail: [hhuang0618@suda.edu.cn](mailto:hhuang0618@suda.edu.cn); [lufang@bucm.edu.cn](mailto:lufang@bucm.edu.cn); [chenjian@cibr.ac.cn](mailto:chenjian@cibr.ac.cn);

[zhkang@suda.edu.cn](mailto:zhkang@suda.edu.cn)

## 1. Experiments section

### Synthesis of CDs

50 g L-ascorbic acid powder was dissolved in 1 L ultrapure water and then the two electrodes (graphite rod, 99.99%, Alfa Aesar Co. Ltd.) were applied with 0.1 A direct current power supply. After 3 weeks, the solution was filtered with slow-speed quantitative filter paper and then the product was dialyzed in a 500 Da dialysis bag against deionized water to remove excess L-ascorbic.

## 2. Additional figures

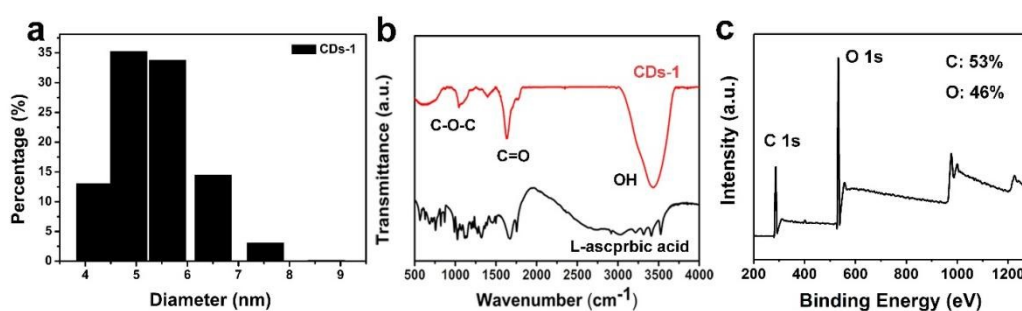

**Figure S1.** (a) Diameter distributions of CDs-1. (b) FTIR spectra of CDs-1 and L-ascorbic acid (red and black traces, respectively). (c) XPS full scan spectrum of CDs-1.

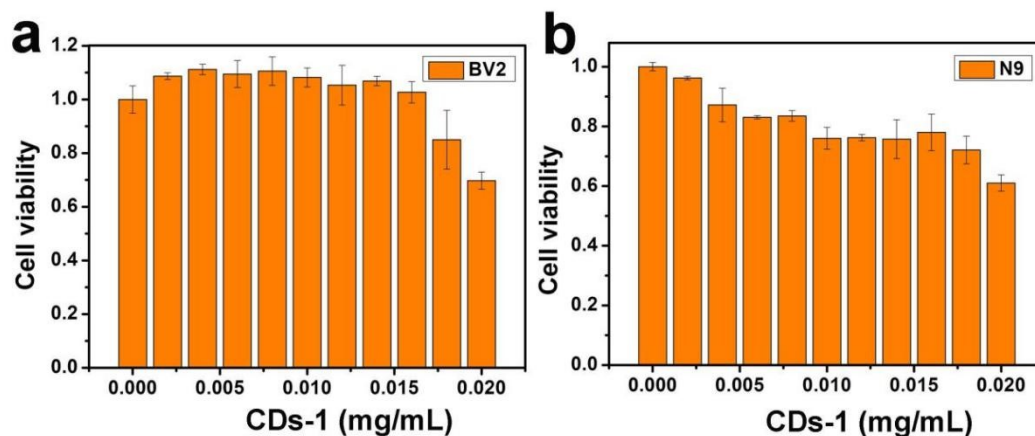

**Figure S2.** Viability of BV2 (a) and N9 (b) cells after 24 h treatment with different concentrations of CDs-1 as calculated from CCK-8 assay.

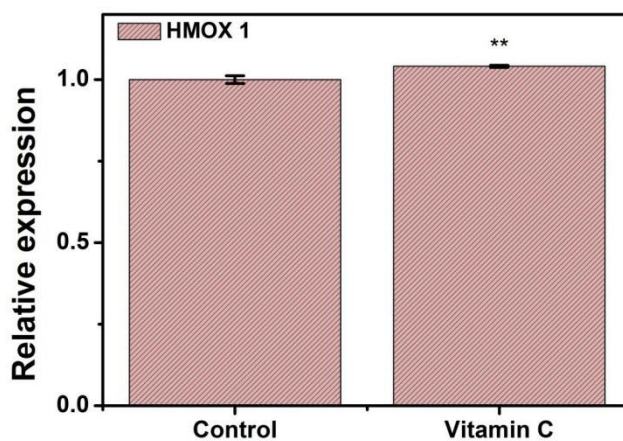

**Figure S3.** Effect of L-ascorbic acid (VC) on HMOX 1 gene expression in RAW264.7 cells. \* $p < 0.05$ , \*\* $p < 0.01$  and \*\*\* $p < 0.001$ , The mean and standard deviation are represented by column and error bar.

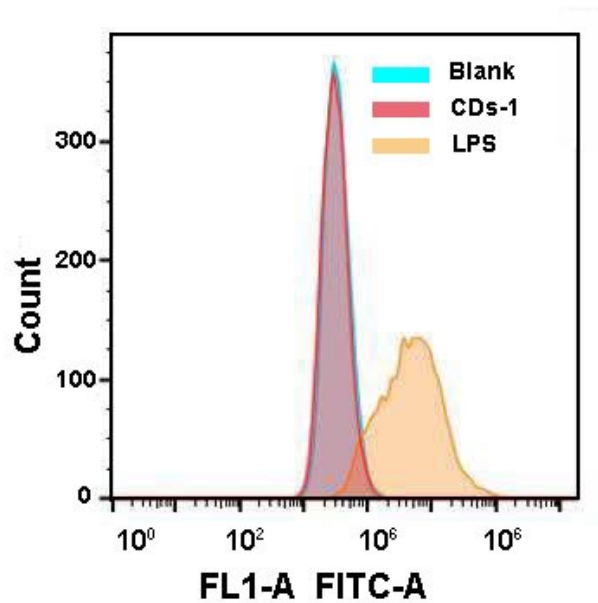

**Figure S4.** The reactive oxygen species (ROS) level of RAW264.7 cells treated with CDs-1 and LPS respectively was tested by flow cytometry. Untreated RAW264.7 was set as blank.

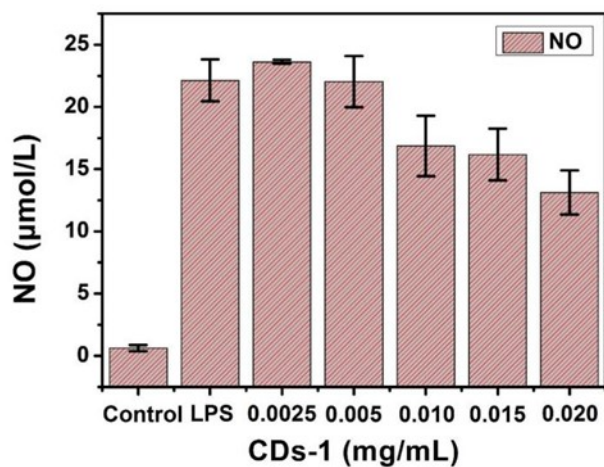

**Figure S5.** Level of NO in RAW264.7 treated with different concentrations of CDs-1.

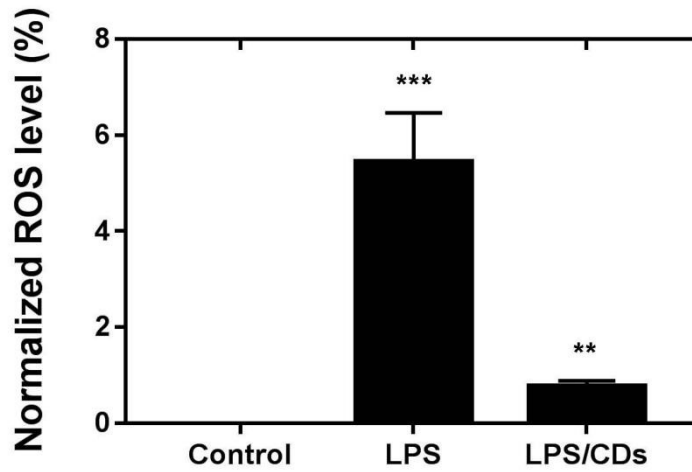

**Figure S6.** Normalized cellular ROS level in RAW264.7 cells in Control group, LPS group and CDs-1-treated-group respectively. \* $p < 0.05$ , \*\* $p < 0.01$  and \*\*\* $p < 0.001$ , The mean and standard deviation are represented by column and error bar.

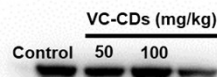

**Figure S7.** The proteins expression of GAPDH in lung tissue of mice treated with CDS-1 for 7 days, the concentrations of CDs-1 were 0, 50 and 100 mg/kg, respectively.

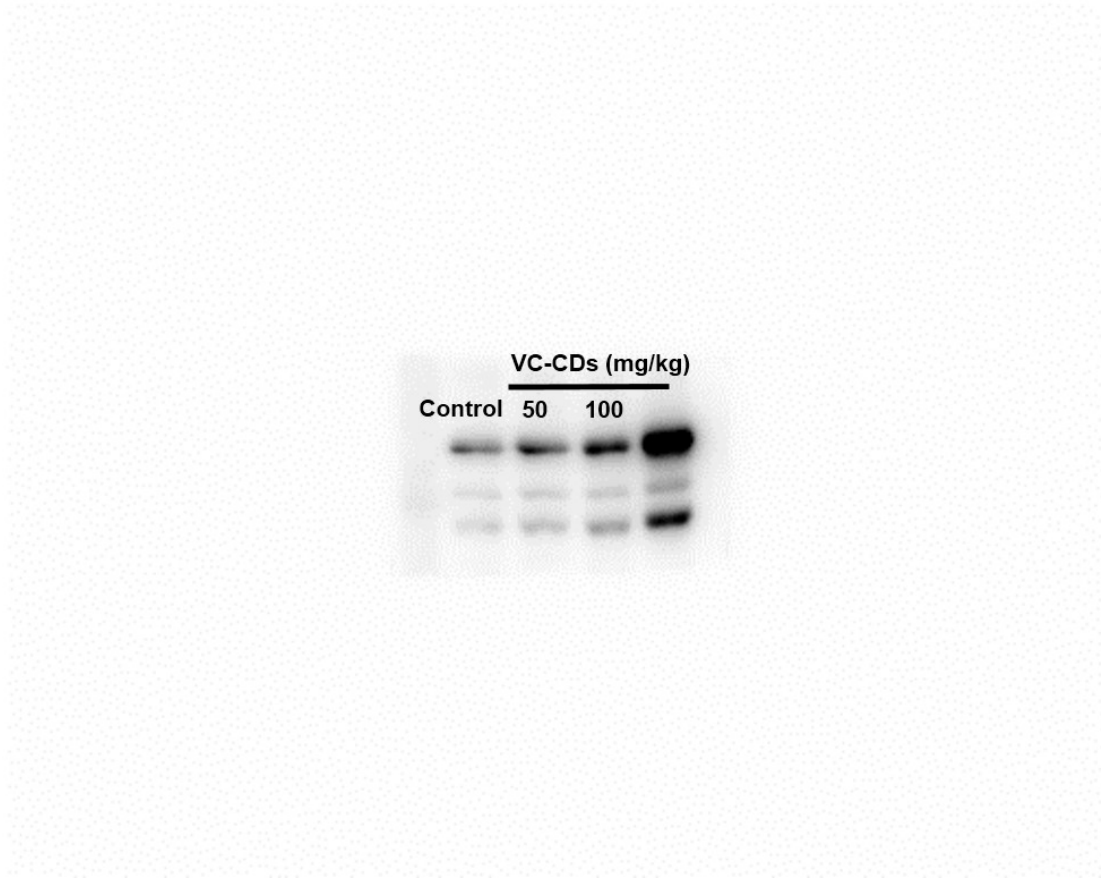

**Figure S8.** The proteins expression of HMOX 1 in lung tissue of mice treated with CDS-1 for 7 days, the concentrations of CDs-1 were 0, 50 and 100 mg/kg, respectively.

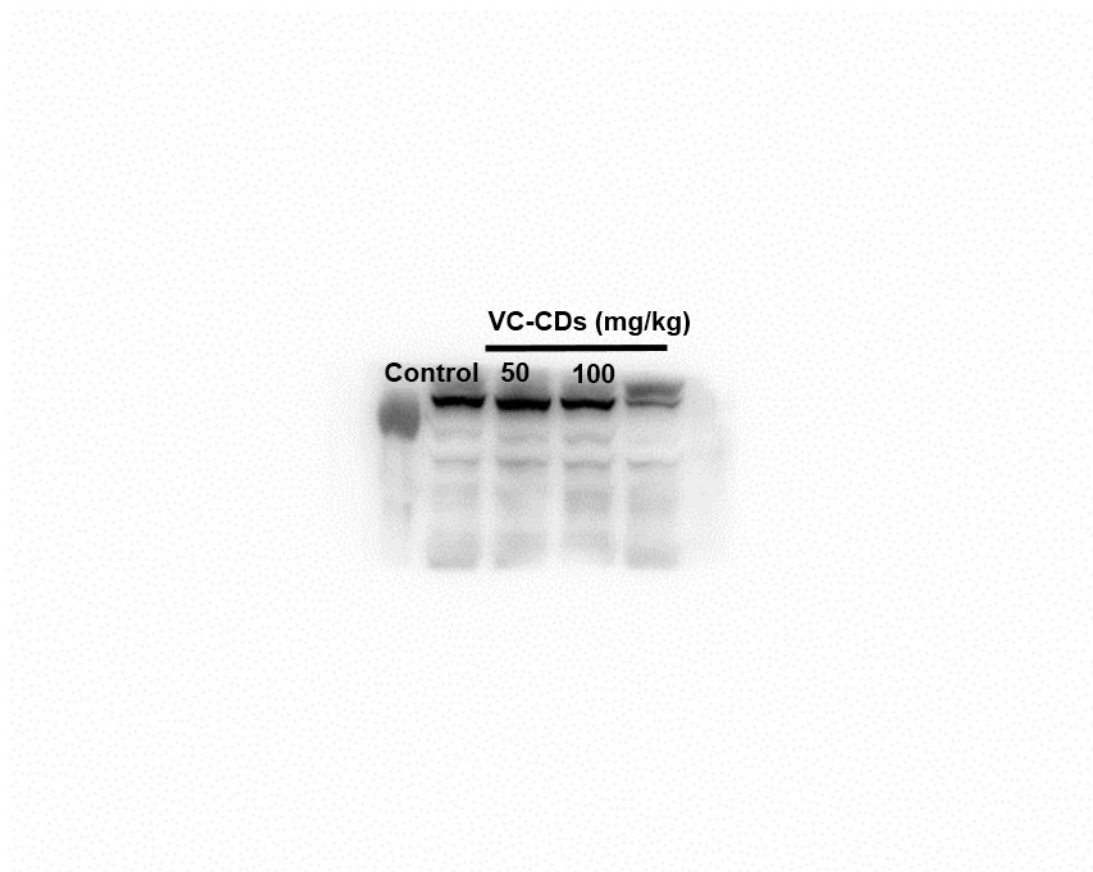

**Figure S9.** The proteins expression of NRF 2 in lung tissue of mice treated with CDS-1 for 7 days, the concentrations of CDs-1 were 0, 50 and 100 mg/kg, respectively.

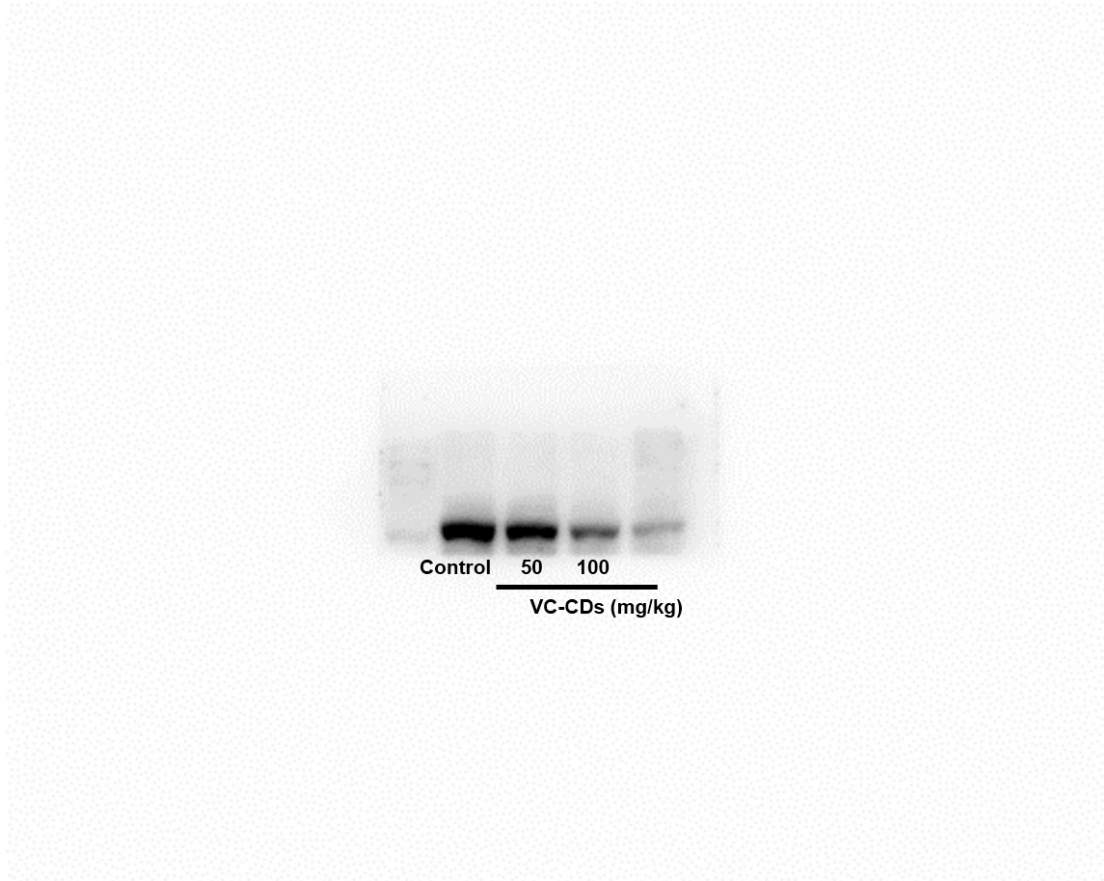

**Figure S10.** The proteins expression of BACH 1 in lung tissue of mice treated with CDS-1 for 7 days, the concentrations of CDs-1 were 0, 50 and 100 mg/kg, respectively.
